# Supplementary material
Source: HighWire-hosted journal article supplement (https://srh.bmj.com/content/47/3/232)
Supplement: inline-supplementary-material-1 [file inline-supplementary-material-1.pdf]

## Supplemental method

### Emergency contraceptive pill (ECP) use in Japan

We obtained and assessed data regarding the number of shipments received and sold by ASKA Pharmaceutical Co., Ltd. (Tokyo, Japan) in 2011–2019. Furthermore, using details from the Population Census of Japan in 2015 and from a previous study, we calculated the proportion of cumulative use of ECPs among women aged 18–39 years who have had sexual intercourse.[1,2] The proportion of cumulative use of ECPs in Japan was calculated using the number of women aged 18–39 who have had sexual intercourse (12,964,000 multiplied by 0.754) in 2015 as the denominator, and the cumulative number of levonorgestrel-alone ECPs as the numerator.[1,2]

### ECP use in the United States (US)

The proportion of women who have used ECPs was calculated through personal interviews with women aged 15–44 years who have had sexual intercourse in households in the US.[3,4]

## References

- 1 Ghaznavi C, Sakamoto H, Yoneoka D, et al. Trends in heterosexual inexperience among young adults in Japan: Analysis of national surveys, 1987-2015. *BMC Public Health* 2019;19:1–10.
- 2 Ministry of Internal Affairs and Communications. Statistics Japan. Statistics Bureau. Population Census. 2015 [internet]. [accessed 2021 Feb 21]. Available from:<https://www.stat.go.jp/english/index.html>
- 3 Daniels K, Mosher WD. Contraceptive methods women have ever used: United States, 1982-2010. *Natl Health Stat Report* 2013;1–15.
- 4 Chandra A, Martinez GM, Mosher WD, et al. Fertility, family planning, and reproductive health of U.S. Women: Data from the 2002 national survey of family growth. *Vital and Health Statistics, Series 23: Data from the National Survey of Family Growth* 2005;23.
